# Supplementary material for: Bio-inspired transparent structural color film and its application in biomimetic camouflage
Source: Royal Society of Chemistry journal article supplement (doi:10.1039/c9nr04360h), 2019-01-01
Supplement: c9nr04360h1.pdf [file c9nr04360h1.pdf]

## Bio-inspired transparent structural color film and its application in biomimetic camouflage

Zipeng Meng,<sup>a‡</sup> Baoting Huang,<sup>a‡</sup> Suli Wu,<sup>a\*</sup> Lu Li<sup>b</sup> and Shufen Zhang<sup>a</sup>

<sup>a</sup>State Key Laboratory of Fine Chemicals, Dalian University of Technology, 2 Linggong Road, Dalian 116024, P.R. China.

E-mail: wusuli@dlut.edu.cn

<sup>b</sup>Qingdao University of Science and Technology, Qingdao 266000, China.

### Supporting Figures:

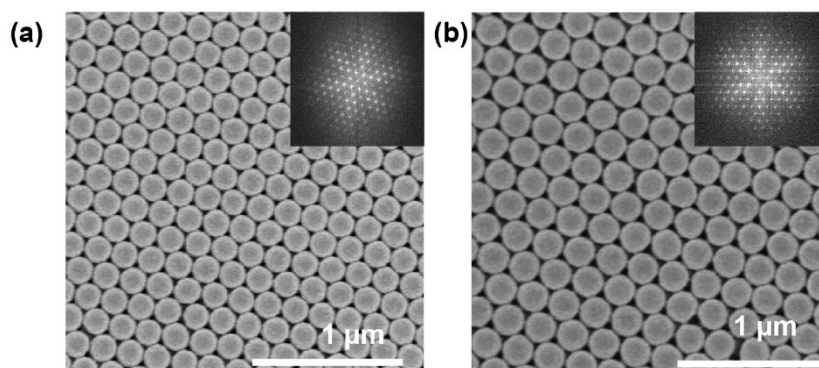

Fig. S1 (a-b) SEM images of the prepared S1 with the 186 and 229 nm of PMMA spheres, the inset is the corresponding 2D-FFT patterns.

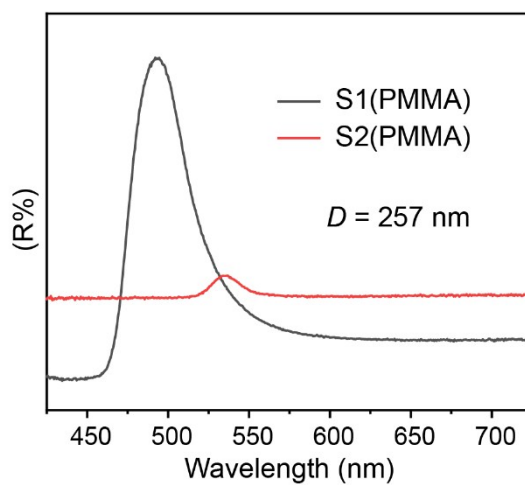

Fig. S2 Reflectance spectra of the prepared S1 with 257 nm of PMMA spheres and corresponding S2(PMMA 257 nm).

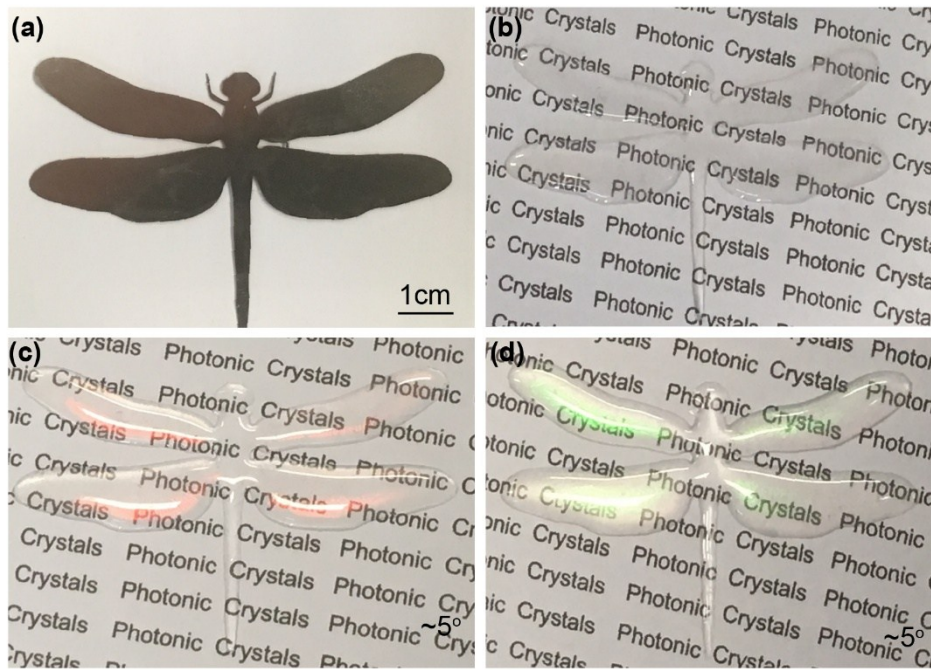

Fig. S3 (a) Digital image of the steel template with the shape of dragonfly and (b-c) Digital images of S2 with the diameter of 257 nm of PMMA spheres under ambient light and in the incident angles of 5° (c) Digital image of S2 with the diameter of 229 nm of PMMA spheres in the incident angles of 5°.

**Table S1** Comparisons about PBG of different PCs film (Take  $\theta = 45^\circ$  as the sample)

| PCs film      | S1     | S2     |
|---------------|--------|--------|
| PMMA (186 nm) | 360 nm | 391 nm |
| PMMA (229 nm) | 443 nm | 482 nm |
| PMMA (257 nm) | 497 nm | 541 nm |
